# Supplementary material for: Use of computerised adaptive testing to reduce the number of items in patient-reported hip and knee outcome scores: an analysis of the NHS England National Patient-Reported Outcome Measures programme
Source: HighWire-hosted journal article supplement (doi:10.1136/bmjopen-2021-059415), 2022-07-01
Supplement: bmjopen-2021-059415supp001_data_supplement.pdf [file bmjopen-2021-059415supp001_data_supplement.pdf]

## Appendix 1

|    | Item                                                                                                                                                         | Discrimination a | Difficulty b1 | Difficulty b2 | Difficulty b3 | Difficulty b4 | Item RMSEA  |
|----|--------------------------------------------------------------------------------------------------------------------------------------------------------------|------------------|---------------|---------------|---------------|---------------|-------------|
| 1  | During the past 4 weeks..... How would you describe the pain you usually had from your hip?                                                                  | 1.914691405      | 0.164325049   | 2.206224888   | 3.209345224   | 4.186925039   | 0.011       |
| 2  | During the past 4 weeks..... Have you had any trouble with washing and drying yourself (all over) because of your hip?                                       | 1.740856269      | 2.940926073   | -             | 0.609238754   | 1.637069089   | 0.003       |
| 3  | During the past 4 weeks..... Have you had any trouble getting in and out of a car or using public transport because of your hip? (whichever you tend to use) | 2.321961482      | 3.093433431   | -             | 0.496468803   | 1.340835438   | 0.014       |
| 4  | During the past 4 weeks..... Have you been able to put on a pair of socks, stockings or tights?                                                              | 1.547750826      | 1.475337619   | -             | 0.125804902   | 1.50632625    | 0.009       |
| 5  | During the past 4 weeks..... Could you do the household shopping on your own?                                                                                | 2.376360472      | 0.348672227   | -             | 0.659403189   | 1.549282667   | NA          |
| 6  | During the past 4 weeks..... For how long have you been able to walk before pain from your hip becomes severe? (with or without a stick)                     | 1.668616909      | 0.642568044   | -             | 0.719789266   | 2.086871457   | NA          |
| 7  | During the past 4 weeks..... Have you been able to climb a flight of stairs?                                                                                 | 2.360767142      | 1.889430738   | -             | 0.433126962   | 0.981278344   | 2.144165736 |
| 8  | During the past 4 weeks..... After a meal (sat at a table), how painful has it been for you to stand up from a chair because of your hip?                    | 2.258019654      | -2.12187152   | -             | 0.056100465   | 1.205103327   | 2.706143566 |
| 9  | During the past 4 weeks..... Have you been limping when walking, because of your hip?                                                                        | 1.42746619       | 0.251525777   | 1.633812085   | 4.171461153   | NA            | 0.007       |
| 10 | During the past 4 weeks..... Have you had any sudden, severe pain - 'shooting', 'stabbing' or 'spasms' - from the affected hip?                              | 1.324519295      | 0.892084132   | -             | 0.289697408   | 1.709666854   | NA          |
| 11 | During the past 4 weeks..... How much has pain from your hip interfered with your usual work (including housework)?                                          | 2.775690212      | 1.028278183   | -             | 0.415519961   | 1.607031821   | 2.776328526 |
| 12 | During the past 4 weeks..... Have you been troubled by pain from your hip in bed at night?                                                                   | 1.260879482      | 0.194492803   | -             | 1.068727884   | 2.493862719   | NA          |

Table 1 : Oxford Hip Score items with associated IRT derived difficulty and discrimination parameters.

## Appendix 1

|    | Item                                                                                                                                                                | Discrimination a | Difficulty b1 | Difficulty b2 | Difficulty b3 | Difficulty b4 | Item RMSEA |
|----|---------------------------------------------------------------------------------------------------------------------------------------------------------------------|------------------|---------------|---------------|---------------|---------------|------------|
| 1  | During the past 4 weeks..... How would you describe the pain you usually have from your knee?                                                                       | 1.683615138      | 0.035557101   | 2.328205621   | 3.433951121   | 4.561327448   | 0.005      |
| 2  | During the past 4 weeks..... Have you had any trouble with washing and drying yourself (all over) because of your knee?                                             | 1.492252738      | -4.326258935  | -2.018457992  | -0.292460352  | 0.770869766   | 0.016      |
| 3  | During the past 4 weeks..... Have you had any trouble getting in and out of a car or using public transport because of your knee? (whichever you would tend to use) | 1.932656761      | -3.747375182  | -0.968340445  | 0.945305979   | 2.030550642   | 0.007      |
| 4  | During the past 4 weeks..... For how long have you been able to walk before pain from                                                                               | 1.387915921      | -1.095979526  | 0.648687269   | 2.23788967    | NA            | 0.010      |
| 5  | During the past 4 weeks..... After a meal (sat at a table), how painful has it been for you to stand up from a chair because of your knee?                          | 1.973493643      | -2.473540467  | -0.110575589  | 1.302091221   | 2.835473629   | 0.003      |
| 6  | During the past 4 weeks..... Have you been limping when walking, because of your knee?                                                                              | 1.263415959      | -0.270638346  | 1.272611253   | 4.061594039   | NA            | 0.011      |
| 7  | During the past 4 weeks..... Could you kneel down and get up again afterwards?                                                                                      | 1.413075377      | -0.361382764  | 1.150705024   | 2.902993876   | 4.420398561   | 0.018      |
| 8  | During the past 4 weeks..... Have you been troubled by pain from your knee in bed at night?                                                                         | 1.23865998       | -0.757873886  | 0.547071749   | 2.065465542   | NA            | 0.005      |
| 9  | During the past 4 weeks..... How much has pain from your knee interfered with your usual work (including housework)?                                                | 2.563072755      | -1.375193192  | 0.177463486   | 1.561747127   | 2.724240742   | 0.008      |
| 10 | During the past 4 weeks..... Have you felt that your knee might suddenly 'give way' or let you down?                                                                | 1.507070288      | -1.693738699  | -0.259659605  | 0.672066751   | 2.202410973   | 0.008      |
| 11 | During the past 4 weeks..... Could you do the household shopping on your own?                                                                                       | 2.235209642      | -1.264960065  | -0.483151955  | 0.662939289   | 1.641645648   | 0.019      |
| 12 | 2 During the past 4 weeks..... Could you walk down one flight of stairs?                                                                                            | 2.135163585      | -2.14417636   | -0.398774015  | 1.11031124    | 2.341481914   | 0.011      |

Table 2 : Oxford Knee Score items with associated IRT derived difficulty and discrimination parameters.
